# Supplementary material for: Heterogeneous composition of key metabolic gene clusters in a vent mussel symbiont population
Source: PubMed Central journal article supplement — ISME J. 2015 Sep 29;10(4):990–1001. doi: 10.1038/ismej.2015.176 (PMC4796938; doi:10.1038/ismej.2015.176), 2015-09-29
Supplement: ismej2015176x4.pdf [file ismej2015176x4.pdf]

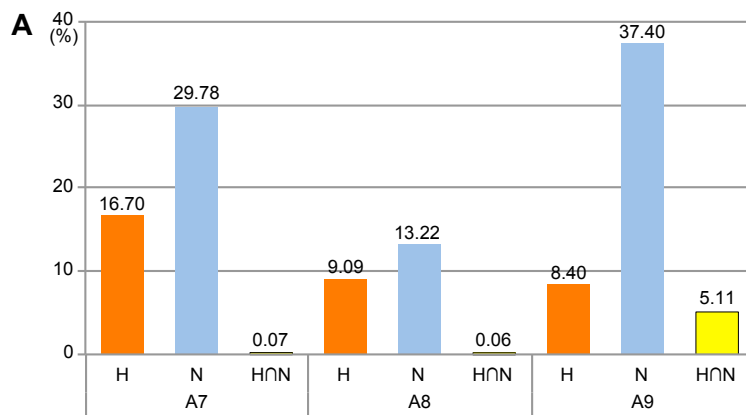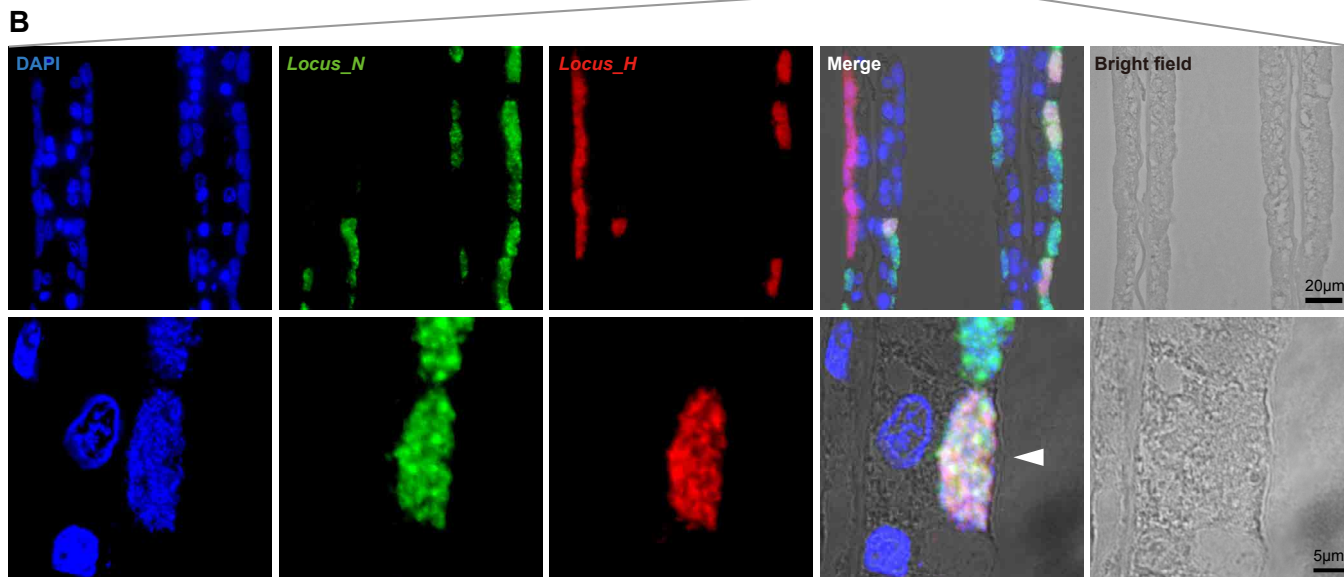

**C**

|     | RT | <i>hupL</i> | <i>hupS</i> | <i>narG</i> | <i>narH</i> | <i>narI</i> | <i>narJ</i> | <i>dnaA</i> | <i>cbbM</i> |  |
|-----|----|-------------|-------------|-------------|-------------|-------------|-------------|-------------|-------------|--|
| A7  | +  | [Gel image] |             |             |             |             |             |             |             |  |
|     | -  | [Gel image] |             |             |             |             |             |             |             |  |
| A8  | +  | [Gel image] |             |             |             |             |             |             |             |  |
|     | -  | [Gel image] |             |             |             |             |             |             |             |  |
| A9  | +  | [Gel image] |             |             |             |             |             |             |             |  |
|     | -  | [Gel image] |             |             |             |             |             |             |             |  |
| A10 | +  | [Gel image] |             |             |             |             |             |             |             |  |
|     | -  | [Gel image] |             |             |             |             |             |             |             |  |
| A11 | +  | [Gel image] |             |             |             |             |             |             |             |  |
|     | -  | [Gel image] |             |             |             |             |             |             |             |  |
| A12 | +  | [Gel image] |             |             |             |             |             |             |             |  |
|     | -  | [Gel image] |             |             |             |             |             |             |             |  |
| A13 | +  | [Gel image] |             |             |             |             |             |             |             |  |
|     | -  | [Gel image] |             |             |             |             |             |             |             |  |
| A14 | +  | [Gel image] |             |             |             |             |             |             |             |  |
|     | -  | [Gel image] |             |             |             |             |             |             |             |  |
| A15 | +  | [Gel image] |             |             |             |             |             |             |             |  |
|     | -  | [Gel image] |             |             |             |             |             |             |             |  |
