# Supplementary material for: Heterogeneous composition of key metabolic gene clusters in a vent mussel symbiont population
Source: PubMed Central journal article supplement — ISME J. 2015 Sep 29;10(4):990–1001. doi: 10.1038/ismej.2015.176 (PMC4796938; doi:10.1038/ismej.2015.176), 2015-09-29
Supplement: ismej2015176x8.pdf [file ismej2015176x8.pdf]

**Table S1a: *B. septemdirerum* individuals used in this study\***

| individual ID | cruise No. | clive No. | date      | vent site | Lat./Long.                 | depth (m) | shell length (mm) | experiment                                                   |
|---------------|------------|-----------|-----------|-----------|----------------------------|-----------|-------------------|--------------------------------------------------------------|
| A1            | NT10-08    | HPD1126   | 14-May-10 | Myojin    | 32°6.234'N / 139°52.152'E  | 1,228     |                   | symbiont genome sequencing, PCR for ISH probe template, qPCR |
| A2            | NT10-08    | HPD1126   | 14-May-10 | Myojin    | 32°6.234'N / 139°52.152'E  | 1,228     |                   | qPCR                                                         |
| A3            | NT10-08    | HPD1126   | 14-May-10 | Myojin    | 32°6.234'N / 139°52.152'E  | 1,228     |                   | qPCR                                                         |
| A4            | NT10-08    | HPD1127   | 15-May-10 | Myojin    | 32°6.210'N / 139°52.056'E  | 1,249     |                   | qPCR                                                         |
| A5            | NT11-09    | HPD1286   | 18-Jun-11 | Suiyo     | 28°34.285'N / 140°38.668'E | 1,386     |                   | qPCR                                                         |
| A6            | NT11-09    | HPD1286   | 18-Jun-11 | Suiyo     | 28°34.285'N / 140°38.668'E | 1,386     |                   | qPCR                                                         |
| A7            | NT11-09    | HPD1288   | 21-Jun-11 | Myojin    | 32°06.287'N / 139°52.193'E | 1,278     | 110-120           | FISH, RT-PCR                                                 |
| A8            | NT11-09    | HPD1288   | 21-Jun-11 | Myojin    | 32°06.287'N / 139°52.193'E | 1,278     |                   | FISH, RT-PCR                                                 |
| A9            | NT11-09    | HPD1288   | 21-Jun-11 | Myojin    | 32°06.287'N / 139°52.193'E | 1,278     |                   | FISH, RT-PCR                                                 |
| A10           | NT11-09    | HPD1284   | 16-Jun-11 | Myojin    | 32°6.278'N / 139°52.081'E  | 1,303     |                   | WISH, RT-PCR                                                 |
| A11           | NT11-09    | HPD1284   | 16-Jun-11 | Myojin    | 32°6.278'N / 139°52.081'E  | 1,303     |                   | WISH, RT-PCR                                                 |
| A12           | NT11-09    | HPD1284   | 16-Jun-11 | Myojin    | 32°6.278'N / 139°52.081'E  | 1,303     |                   | RT-PCR                                                       |
| A13           | NT11-09    | HPD1287   | 19-Jun-11 | Suiyo     | 28°34.267'N / 140°38.609'E | 1,384     |                   | RT-PCR                                                       |
| A14           | NT11-09    | HPD1287   | 19-Jun-11 | Suiyo     | 28°34.267'N / 140°38.609'E | 1,384     |                   | RT-PCR                                                       |
| A15           | NT11-09    | HPD1287   | 19-Jun-11 | Suiyo     | 28°34.267'N / 140°38.609'E | 1,384     |                   | RT-PCR                                                       |
| J1            | NT07-08    | HPD0679   | 24-May-07 | Suiyo     | 28°34.272'N / 140°38.676'E | 1,386     | 2.8               | qPCR                                                         |
| J2            | NT07-08    | HPD0679   | 24-May-07 | Suiyo     | 28°34.272'N / 140°38.676'E | 1,386     | 3.1               | qPCR                                                         |
| J3            | NT07-08    | HPD0679   | 24-May-07 | Suiyo     | 28°34.272'N / 140°38.676'E | 1,386     | 3.3               | qPCR                                                         |
| J4            | NT07-08    | HPD0680   | 25-May-07 | Suiyo     | 28°34.266'N / 140°38.676'E | 1,386     | 3.1               | qPCR                                                         |
| J5            | NT07-08    | HPD0680   | 25-May-07 | Suiyo     | 28°34.266'N / 140°38.676'E | 1,386     | 3.5               | qPCR                                                         |
| J6            | NT07-08    | HPD0680   | 25-May-07 | Suiyo     | 28°34.266'N / 140°38.676'E | 1,386     | 4.9               | qPCR                                                         |

\*The minimum information about a genome sequence (MIGS) specification and a MARKer gene Sequence (MIMARKS) of *B. septemdirerum* individuals used in this study are shown in Table S1b-j.

**Table S1b: The minimum information about a genome sequence (MIGS) specification**

|                                                                                                             |                            |              |                                                                                                                                                                                                                                                                       |
|-------------------------------------------------------------------------------------------------------------|----------------------------|--------------|-----------------------------------------------------------------------------------------------------------------------------------------------------------------------------------------------------------------------------------------------------------------------|
| <a href="http://www.ncbi.nlm.nih.gov/nuccore/CP001978.1">http://www.ncbi.nlm.nih.gov/nuccore/CP001978.1</a> |                            |              |                                                                                                                                                                                                                                                                       |
|                                                                                                             | <b>INSDC name of field</b> | <b>Units</b> |                                                                                                                                                                                                                                                                       |
| <b>Investigation</b>                                                                                        |                            |              |                                                                                                                                                                                                                                                                       |
| submitted to insdc                                                                                          | submitted to insdc         |              | TRUE                                                                                                                                                                                                                                                                  |
| Investigation type                                                                                          | investigation type         |              | bacteria                                                                                                                                                                                                                                                              |
| Project name                                                                                                | project_name               |              | Bathymodiolus septemdiarium endosymbiont genome sequencing                                                                                                                                                                                                            |
| <b>Environment</b>                                                                                          |                            |              |                                                                                                                                                                                                                                                                       |
| Geographic location (latitude and longitude)                                                                | lat lon                    |              | 32.1041 N 139.2193 E                                                                                                                                                                                                                                                  |
| depth                                                                                                       | depth                      | meter        | -1228                                                                                                                                                                                                                                                                 |
| Geographic location (country and/or sea,region)                                                             | geo_loc_name               |              | Japan:izu-Bonin Arc, Myojin knoll                                                                                                                                                                                                                                     |
| Collection date                                                                                             | collection_date            |              | 2010-05-14                                                                                                                                                                                                                                                            |
| Environment (biome)                                                                                         | biome                      |              | marine hydrothermal vent                                                                                                                                                                                                                                              |
| Environment (feature)                                                                                       | feature                    |              | aminal-associated habitat                                                                                                                                                                                                                                             |
| Environment (material)                                                                                      | material                   |              | organ                                                                                                                                                                                                                                                                 |
| <b>MIGS/MIMS/MIMARKS Extension</b>                                                                          |                            |              |                                                                                                                                                                                                                                                                       |
| Environmental package                                                                                       | env_package                |              | host-associated                                                                                                                                                                                                                                                       |
| host common name                                                                                            | host common name           |              | Bathymodiolus septemdiarium                                                                                                                                                                                                                                           |
| host taxid                                                                                                  | host taxid                 |              | 220392                                                                                                                                                                                                                                                                |
| host body site                                                                                              | host body site             |              | gill                                                                                                                                                                                                                                                                  |
| host length                                                                                                 | host length                | millimeter   | 110-120                                                                                                                                                                                                                                                               |
| <b>Nucleic Acid Sequence Source</b>                                                                         |                            |              |                                                                                                                                                                                                                                                                       |
| subspecific genetic lineage                                                                                 | subspecf_gen_lin           |              | cellular organisms; Bacteria; Proteobacteria; Gammaproteobacteria; unclassified Gammaproteobacteria; unclassified Gammaproteobacteria (miscellaneous); gamma proteobacterium intracellular symbiont of Bathymodiolus septemdiarium                                    |
| Number of replicons                                                                                         | num_replicons              |              | 1                                                                                                                                                                                                                                                                     |
| Reference for biomaterial                                                                                   | ref_biomaterial            |              | None                                                                                                                                                                                                                                                                  |
| Observed biotic relationship                                                                                | biotic_relationship        |              | symbiot                                                                                                                                                                                                                                                               |
| Trophic level                                                                                               | trophic_level              |              | chemolithoautotroph                                                                                                                                                                                                                                                   |
| Relationship to oxygen                                                                                      | rel_to_oxygen              |              | aerobic                                                                                                                                                                                                                                                               |
| Isolation and growth condition                                                                              | isol_growth_condt          |              | Unknown                                                                                                                                                                                                                                                               |
| sample collection device or method                                                                          | samp_collect_device        |              | ROV (Remotely Operated Vehicle) suction sampler                                                                                                                                                                                                                       |
| sample material processing                                                                                  | samp_mat_process           |              | Frozen specimen                                                                                                                                                                                                                                                       |
| <b>Sequencing</b>                                                                                           |                            |              |                                                                                                                                                                                                                                                                       |
| nucleic acid extraction                                                                                     | nucl acid_ext              |              | <b>17493812</b>                                                                                                                                                                                                                                                       |
| Sequencing method                                                                                           | sequencing_meth            |              | pyrosequencing, illumina, pacbio                                                                                                                                                                                                                                      |
| Assembly                                                                                                    | assembly                   |              | assembler: Newbler (Parameters: Seed step:12; Seed length: 16; minimum overlap length: 40; minimum overlap identity: 90; Alignment identity score: 2; Alignment difference score: -3); error rate: read error 1.62%; error rate estimation: from Newbler base calling |
| Finishing strategy                                                                                          | finishing_strategy         |              | status: complete; coverage:40x; contigs: 1                                                                                                                                                                                                                            |
| Relevant electronic resources                                                                               | url                        |              | <a href="http://www.ncbi.nlm.nih.gov/genomeprj/PRJDB949">http://www.ncbi.nlm.nih.gov/genomeprj/PRJDB949</a>                                                                                                                                                           |



















**Table S2: qPCR Primers used in this study**

| Primer set                         | dnaA-qF, 5'-AACCAATAATGGCACCCCAATACATTC-3'<br>dnaA-qR, 5'-GGTTTCGATGCCCAATTTCAATT-3' | hupL-qF, 5'-GCGCTAAGAGTGTAAATGGATTATGG-3'<br>hupL-qR, 5'-ACCGGGAAATACTTCGTTCCAA-3' | narG-qF, 5'-TGTGGTTGCCCTTGCCCTATTTT-3'<br>narG-qR, 5'-CACTCGTCATCAAAACCAAGC TTT-3' |
|------------------------------------|--------------------------------------------------------------------------------------|------------------------------------------------------------------------------------|------------------------------------------------------------------------------------|
| Target gene                        | <i>dnaA</i>                                                                          | <i>hupL</i>                                                                        | <i>narG</i>                                                                        |
| Amplicon length (bp)               | 121                                                                                  | 115                                                                                | 84                                                                                 |
| Slope                              | -3.419                                                                               | -3.461                                                                             | -3.547                                                                             |
| y-Intercept                        | 14.40                                                                                | 12.77                                                                              | 14.93                                                                              |
| Efficiency (%)                     | 96.09                                                                                | 94.50                                                                              | 91.39                                                                              |
| R <sup>2</sup>                     | 1.000                                                                                | 0.999                                                                              | 0.999                                                                              |
| Cq of NTC                          | 30.86                                                                                | 32.14                                                                              | 34.37                                                                              |
| ΔCq between NTC and minimum sample | 13.37                                                                                | 12.31                                                                              | 15.79                                                                              |
| Linear dynamic range (Cq)          | 14.38 to 23.94                                                                       | 12.66 to 22.40                                                                     | 14.93 to 24.76                                                                     |

Table S3: Details of the loci with low mapping depth\* \*\*

| Locus name       | Type         | Locus_tag  | Strand  | 5' of gene                            | 3' of gene                                                | Product                                                                  | Length (bp) | Ave. depth |
|------------------|--------------|------------|---------|---------------------------------------|-----------------------------------------------------------|--------------------------------------------------------------------------|-------------|------------|
|                  | CDS          | BSEPE_0075 | +       | 81,458                                | 82,723                                                    | phosphoribosylamine-glycine ligase                                       | 1,266       | 1,185      |
|                  | CDS          | BSEPE_0076 | +       | 82,944                                | 84,263                                                    | conserved hypothetical protein                                           | 1,320       | 2,263      |
|                  | CDS          | BSEPE_0077 | +       | 84,260                                | 84,823                                                    | ribonuclease HII, duplicate gene of BSEPE_0077 and BSEPE_0088            | 564         | 1,242      |
| LDS02<br>Locus_N | DirectRepeat |            | +       | 84,326                                | 84,805                                                    |                                                                          | 480         |            |
|                  | CDS          | BSEPE_0078 | -       | 84,907                                | 85,389                                                    | CBS domain membrane protein                                              | 483         | 489        |
|                  | CDS          | BSEPE_0079 | -       | 85,409                                | 85,744                                                    | tRNA 2-thiouridine synthesizing protein E                                | 336         | 730        |
|                  | CDS          | BSEPE_0080 | -       | 85,758                                | 86,213                                                    | conserved hypothetical protein                                           | 456         | 927        |
|                  | CDS          | BSEPE_0081 | -       | 86,219                                | 86,899                                                    | nitrate reductase 1, gamma subunit                                       | 681         | 934        |
|                  | CDS          | BSEPE_0082 | -       | 86,910                                | 87,569                                                    | nitrate reductase 1, delta subunit                                       | 660         | 682        |
|                  | CDS          | BSEPE_0083 | -       | 87,569                                | 89,107                                                    | nitrate reductase 1, beta subunit                                        | 1,539       | 557        |
|                  | CDS          | BSEPE_0084 | -       | 89,104                                | 92,838                                                    | nitrate reductase 1, alpha subunit                                       | 3,735       | 666        |
|                  | CDS          | BSEPE_0085 | -       | 92,890                                | 94,509                                                    | MFS transporter, NNP family, nitrate/nitrite transporter                 | 1,620       | 490        |
|                  | CDS          | BSEPE_0086 | -       | 94,549                                | 95,826                                                    | MFS transporter, NNP family, nitrate/nitrite transporter                 | 1,278       | 573        |
|                  | CDS          | BSEPE_0087 | +       | 95,941                                | 97,485                                                    | CRP/FNR family transcriptional regulator, transcriptional activator FtrB | 1,545       | 928        |
|                  | DirectRepeat |            | +       | 97,609                                | 98,088                                                    |                                                                          | 480         |            |
|                  | CDS          | BSEPE_0088 | +       | 97,531                                | 98,103                                                    | ribonuclease HII, duplicate gene of BSEPE_0077 and BSEPE_0088            | 573         | 1,273      |
|                  | CDS          | BSEPE_0089 | -       | 98,081                                | 98,806                                                    | lipoprotein                                                              | 726         | 2,387      |
|                  | CDS          | BSEPE_0090 | -       | 98,803                                | 99,177                                                    | conserved hypothetical protein                                           | 375         | 3,236      |
| CDS              | BSEPE_0091   | +          | 99,181  | 100,005                               | 16S rRNA (cytidine1402-2'-O)-methyltransferase            | 825                                                                      | 1,557       |            |
| CDS              | BSEPE_0158   | -          | 168,621 | 169,445                               | DNA ligase (ATP)                                          | 825                                                                      | 2,498       |            |
| DirectRepeat     |              | +          | 169,216 | 169,225                               |                                                           | 10                                                                       |             |            |
| LDS03            | CDS          | BSEPE_0159 | -       | 169,450                               | 169,602                                                   | ATP-dependent DNA helicase RecG                                          | 153         | 735        |
|                  | CDS          | BSEPE_0160 | -       | 169,727                               | 170,959                                                   | conserved hypothetical protein                                           | 1,233       | 776        |
|                  | CDS          | BSEPE_0161 | -       | 170,969                               | 171,811                                                   | hypothetical protein                                                     | 843         | 760        |
|                  | CDS          | BSEPE_0162 | -       | 171,812                               | 171,964                                                   | hypothetical protein                                                     | 153         | 480        |
|                  | CDS          | BSEPE_0163 | -       | 171,951                               | 172,679                                                   | hypothetical protein                                                     | 729         | 540        |
|                  | CDS          | BSEPE_0164 | -       | 172,679                               | 173,248                                                   | hypothetical protein                                                     | 570         | 639        |
|                  | CDS          | BSEPE_0165 | -       | 173,281                               | 174,567                                                   | hypothetical protein                                                     | 1,287       | 441        |
|                  | CDS          | BSEPE_0166 | -       | 174,583                               | 175,842                                                   | hypothetical protein                                                     | 1,260       | 583        |
|                  | CDS          | BSEPE_0167 | -       | 175,835                               | 176,683                                                   | conserved hypothetical protein                                           | 849         | 695        |
|                  | DirectRepeat |            | +       | 176,392                               | 176,401                                                   |                                                                          | 10          |            |
|                  | CDS          | BSEPE_0168 | -       | 176,686                               | 178,089                                                   | dihydroliipoamide dehydrogenase                                          | 1,404       | 1,187      |
|                  | CDS          | BSEPE_0169 | -       | 178,082                               | 179,602                                                   | pyruvate dehydrogenase E2 component, dihydroliipoamide acetyltransferase | 1,521       | 1,478      |
|                  | CDS          | BSEPE_0170 | +       | 179,688                               | 180,599                                                   | antibiotic transport system ATP-binding protein                          | 912         | 2,809      |
|                  | CDS          | BSEPE_0213 | -       | 214,343                               | 214,816                                                   | chorismate-pyruvate lyase                                                | 474         | 2,423      |
|                  | CDS          | BSEPE_0214 | -       | 214,890                               | 216,953                                                   | ATP-dependent DNA helicase RecG                                          | 2,064       | 2,170      |
| CDS              | BSEPE_0215   | -          | 216,955 | 217,341                               | TdcF protein                                              | 387                                                                      | 1,674       |            |
| gene             | BSEPE_0216   | -          | 217,516 | 217,743                               | Pseudogene. C-terminus of hypothetical protein BSEPE_0247 | 228                                                                      | 3,212       |            |
| DirectRepeat     |              | +          | 217,501 | 217,773                               |                                                           | 273                                                                      |             |            |
| LDS04<br>Locus_H | CDS          | BSEPE_0217 | -       | 218,149                               | 219,171                                                   | hydrogenase expression/formation protein HypE                            | 1,023       | 233        |
|                  | CDS          | BSEPE_0218 | -       | 219,171                               | 220,301                                                   | hydrogenase expression/formation protein HypD                            | 1,131       | 390        |
|                  | CDS          | BSEPE_0219 | -       | 220,303                               | 220,578                                                   | hydrogenase expression/formation protein HypC2                           | 276         | 333        |
|                  | CDS          | BSEPE_0220 | -       | 220,578                               | 221,825                                                   | two-component system response regulator HupR                             | 1,248       | 463        |
|                  | CDS          | BSEPE_0221 | -       | 222,076                               | 222,966                                                   | hydrogenase nickel incorporation protein HypB                            | 891         | 320        |
|                  | CDS          | BSEPE_0222 | -       | 222,970                               | 223,293                                                   | hydrogenase nickel incorporation protein HypA/HybF                       | 324         | 262        |
|                  | CDS          | BSEPE_0223 | -       | 223,307                               | 224,476                                                   | hydrogenase expression/formation protein HupK                            | 1,170       | 415        |
|                  | CDS          | BSEPE_0224 | -       | 224,476                               | 225,009                                                   | hydrogenase expression/formation protein HupJ                            | 534         | 494        |
|                  | CDS          | BSEPE_0225 | -       | 225,018                               | 225,245                                                   | rubredoxin HupI                                                          | 228         | 421        |
|                  | CDS          | BSEPE_0226 | -       | 225,242                               | 226,120                                                   | hydrogenase-1 operon protein HyaF                                        | 879         | 528        |
|                  | CDS          | BSEPE_0227 | -       | 226,137                               | 226,544                                                   | hydrogenase-1 operon protein HyaE                                        | 408         | 346        |
|                  | CDS          | BSEPE_0228 | -       | 226,549                               | 226,857                                                   | hydrogenase expression/formation protein HypC                            | 309         | 250        |
|                  | CDS          | BSEPE_0229 | -       | 226,858                               | 227,553                                                   | hydrogenase 1 maturation protease HyaD                                   | 696         | 399        |
|                  | CDS          | BSEPE_0230 | -       | 227,626                               | 228,357                                                   | Ni/Fe-hydrogenase 1 B-type cytochrome subunit HyaC                       | 732         | 410        |
|                  | CDS          | BSEPE_0231 | -       | 228,384                               | 228,653                                                   | conserved hypothetical protein                                           | 270         | 712        |
|                  | CDS          | BSEPE_0232 | -       | 228,664                               | 230,478                                                   | hydrogenase large subunit HupL                                           | 1,815       | 402        |
|                  | CDS          | BSEPE_0233 | -       | 230,482                               | 231,588                                                   | hydrogenase small subunit HupS                                           | 1,107       | 296        |
|                  | CDS          | BSEPE_0234 | +       | 231,809                               | 232,936                                                   | RNA polymerase sigma-54 factor RpoN                                      | 1,128       | 586        |
|                  | gene         | BSEPE_0235 | -       | 232,928                               | 233,041                                                   | Pseudogene. C-terminus of transhydrogenase subunit beta                  | 114         | 543        |
|                  | gene         | BSEPE_0236 | -       | 233,248                               | 234,184                                                   | Pseudogene. conserved hypothetical protein                               | 937         | 494        |
|                  | CDS          | BSEPE_0237 | -       | 234,278                               | 235,675                                                   | NAD(P) transhydrogenase subunit beta                                     | 1,398       | 453        |
|                  | CDS          | BSEPE_0238 | -       | 235,684                               | 237,249                                                   | NAD(P) transhydrogenase subunit alpha                                    | 1,566       | 351        |
|                  | CDS          | BSEPE_0239 | -       | 237,311                               | 237,841                                                   | inorganic pyrophosphatase                                                | 531         | 326        |
|                  | gene         | BSEPE_0240 | -       | 237,860                               | 238,093                                                   | Pseudogene. N-terminus of carbonic anhydrase                             | 234         | 234        |
|                  | CDS          | BSEPE_0241 | -       | 238,071                               | 238,814                                                   | conserved hypothetical protein                                           | 744         | 372        |
|                  | gene         | BSEPE_0242 | -       | 238,814                               | 238,984                                                   | Pseudogene. N-terminus of rhodanese domain protein                       | 171         | 615        |
|                  | CDS          | BSEPE_0243 | -       | 239,142                               | 239,780                                                   | D-sedoheptulose 7-phosphate isomerase                                    | 639         | 376        |
|                  | CDS          | BSEPE_0244 | -       | 239,770                               | 242,136                                                   | hydrogenase maturation protein HypF                                      | 2,367       | 398        |
|                  | CDS          | BSEPE_0245 | -       | 242,093                               | 242,401                                                   | conserved hypothetical protein                                           | 309         | 423        |
|                  | CDS          | BSEPE_0246 | -       | 242,696                               | 243,973                                                   | IS256 family transposase                                                 | 1,278       | ***N.C.    |
| DirectRepeat     |              | +          | 244,127 | 244,399                               |                                                           | 273                                                                      |             |            |
| CDS              | BSEPE_0247   | -          | 244,142 | 244,912                               | conserved hypothetical protein                            | 771                                                                      | 2,459       |            |
| BSEPE_0248       | -            | 244,918    | 245,247 | hypothetical protein                  | 330                                                       | 2,086                                                                    |             |            |
| BSEPE_0249       | -            | 245,244    | 246,113 | succinyl-CoA synthetase alpha subunit | 870                                                       | 1,017                                                                    |             |            |
| CDS              | BSEPE_0452   | -          | 436,410 | 437,447                               | erythronate-4-phosphate dehydrogenase                     | 1,038                                                                    | 1,737       |            |
| CDS              | BSEPE_0453   | -          | 437,461 | 438,123                               | uracil-DNA glycosylase                                    | 663                                                                      | 1,873       |            |
| CDS              | BSEPE_0454   | -          | 438,105 | 438,605                               | thioredoxin                                               | 501                                                                      | 1,806       |            |
| DirectRepeat     |              | +          | 438,622 | 438,698                               |                                                           | 77                                                                       |             |            |
| LDS05            | gene         | BSEPE_0455 | +       | 438,760                               | 439,809                                                   | Pseudogene. IS256 family transposase                                     | 1,050       | 930        |
|                  | CDS          | BSEPE_0456 | +       | 439,862                               | 440,041                                                   | transposase                                                              | 180         | 802        |
|                  | gene         | BSEPE_0457 | +       | 440,121                               | 440,270                                                   | Pseudogene. N-terminus of integrase                                      | 150         | 515        |
|                  | CDS          | BSEPE_0458 | +       | 440,476                               | 440,970                                                   | hypothetical protein                                                     | 495         | 467        |
|                  | CDS          | BSEPE_0459 | +       | 440,981                               | 441,274                                                   | conserved hypothetical protein                                           | 294         | 503        |
|                  | CDS          | BSEPE_0460 | +       | 441,403                               | 442,176                                                   | conserved hypothetical protein                                           | 774         | 564        |
|                  | CDS          | BSEPE_0461 | +       | 442,160                               | 445,753                                                   | DEAD/DEAH box helicase                                                   | 3,594       | 441        |
|                  | DirectRepeat |            | +       | 446,185                               | 446,261                                                   |                                                                          | 77          |            |
|                  | CDS          | BSEPE_0462 | +       | 446,166                               | 446,825                                                   | thiopurine S-methyltransferase                                           | 660         | 1,830      |
|                  | CDS          | BSEPE_0463 | +       | 446,829                               | 447,149                                                   | cold shock protein                                                       | 321         | 1,413      |
| CDS              | BSEPE_0482   | +          | 459,558 | 461,189                               | acetolactate synthase I/II/III large subunit              | 1,632                                                                    | 2,101       |            |
| CDS              | BSEPE_0483   | +          | 461,199 | 462,575                               | aldehyde dehydrogenase                                    | 1,377                                                                    | 1,398       |            |
| CDS              | BSEPE_0484   | +          | 462,758 | 462,895                               | conserved hypothetical protein                            | 138                                                                      | 658         |            |
| CDS              | BSEPE_0485   | +          | 463,194 | 463,550                               | hypothetical protein                                      | 357                                                                      | 115         |            |
| CDS              | BSEPE_0486   | +          | 463,687 | 464,091                               | conserved hypothetical protein                            | 405                                                                      | 843         |            |
| CDS              | BSEPE_0487   | +          | 464,111 | 464,626                               | conserved hypothetical protein                            | 516                                                                      | 949         |            |

|       |            |              |           |           |                                                                    |                                                                 |       |        |       |       |
|-------|------------|--------------|-----------|-----------|--------------------------------------------------------------------|-----------------------------------------------------------------|-------|--------|-------|-------|
|       | CDS        | BSEPE_0488   | +         | 464,628   | 465,050                                                            | conserved hypothetical protein                                  | 423   |        | 907   |       |
|       | gene       | BSEPE_0489   | -         | 465,075   | 465,173                                                            | Pseudogene. C-terminus of lipid A export ATP-binding/permease   | 99    |        | 926   |       |
|       | CDS        | BSEPE_0490   | -         | 465,664   | 467,400                                                            | lipid A export ATP-binding/permease                             |       | 1,737  |       | 1,854 |
|       | CDS        | BSEPE_0491   | +         | 467,472   | 469,112                                                            | CTP synthase                                                    |       | 1,641  |       | 2,210 |
|       | CDS        | BSEPE_0544   | -         | 516,857   | 517,987                                                            | rod shape determining protein RodA                              |       | 1,131  |       | 1,563 |
|       | CDS        | BSEPE_0545   | -         | 517,984   | 518,361                                                            | conserved hypothetical protein                                  |       | 378    |       | 2,538 |
| LDS07 | CDS        | BSEPE_0546   | -         | 518,596   | 523,320                                                            | hypothetical protein                                            | 4,725 |        | 478   |       |
|       | CDS        | BSEPE_0547   | -         | 523,323   | 523,946                                                            | conserved hypothetical protein                                  | 624   |        | 566   |       |
|       | CDS        | BSEPE_0548   | +         | 524,067   | 524,252                                                            | XRE family transcriptional regulator                            | 186   | 7,701  | 724   | 573   |
|       | gene       | BSEPE_0549   | +         | 524,385   | 525,129                                                            | Pseudogene. IS256 family transposase                            | 327   |        | 886   |       |
|       | CDS        | BSEPE_0550   | +         | 525,358   | 526,296                                                            | conserved hypothetical protein                                  | 939   |        | 755   |       |
|       | CDS        | BSEPE_0551   | +         | 526,455   | 526,901                                                            | conserved hypothetical protein                                  |       | 447    |       | 1,590 |
|       | CDS        | BSEPE_0552   | +         | 526,898   | 528,268                                                            | glutamyl-tRNA synthetase                                        |       | 1,371  |       | 1,679 |
| CDS   | BSEPE_0779 | +            | 741,180   | 741,770   | putative toluene tolerance protein                                 |                                                                 | 591   |        | 2,841 |       |
| CDS   | BSEPE_0780 | +            | 741,794   | 742,093   | ArsR family transcriptional regulator                              |                                                                 | 300   |        | 1,370 |       |
| LDS11 |            | DirectRepeat | +         | 742,142   | 742,189                                                            |                                                                 | 48    |        |       |       |
|       | tRNA       | BSEPE_t22    | +         | 742,110   | 742,186                                                            | tRNA-Arg                                                        | 77    |        | 743   |       |
|       | CDS        | BSEPE_0781   | +         | 742,327   | 742,830                                                            | hypothetical protein                                            | 504   |        | 505   |       |
|       | CDS        | BSEPE_0782   | -         | 742,844   | 743,581                                                            | hypothetical protein                                            | 738   |        | 375   |       |
|       | CDS        | BSEPE_0783   | -         | 743,568   | 744,998                                                            | type I restriction enzyme, S subunit                            | 1,431 |        | 210   |       |
|       | CDS        | BSEPE_0784   | -         | 745,028   | 747,013                                                            | type I restriction enzyme, M subunit                            | 1,986 |        | 320   | 385   |
|       | CDS        | BSEPE_0785   | -         | 747,173   | 748,231                                                            | Fic family protein                                              | 1,059 | 10,451 | 443   |       |
|       | CDS        | BSEPE_0786   | -         | 748,329   | 749,774                                                            | conserved hypothetical protein                                  | 1,446 |        | 366   |       |
|       | CDS        | BSEPE_0787   | -         | 749,929   | 750,162                                                            | conserved hypothetical protein                                  | 234   |        | 322   |       |
|       | CDS        | BSEPE_0788   | -         | 750,386   | 751,234                                                            | hypothetical protein                                            | 849   |        | 569   |       |
|       | CDS        | BSEPE_0789   | -         | 751,237   | 752,388                                                            | integrase                                                       | 1,152 |        | 452   |       |
|       |            | DirectRepeat | +         | 752,548   | 752,592                                                            |                                                                 | 45    |        |       |       |
|       | CDS        | BSEPE_0790   | +         | 752,602   | 753,369                                                            | phosphatidylglycerol:prolipoprotein diacylglycerol transferase  |       | 768    |       | 1,495 |
|       | CDS        | BSEPE_0791   | +         | 753,369   | 754,223                                                            | thymidylate synthase                                            |       | 855    |       | 1,709 |
| CDS   | BSEPE_0792 | +            | 754,238   | 754,567   | phosphonoacetate hydrolase                                         |                                                                 | 330   |        | 1,972 |       |
| CDS   | BSEPE_0857 | +            | 813,535   | 814,374   | conserved hypothetical protein                                     |                                                                 | 840   |        | 936   |       |
| CDS   | BSEPE_0858 | -            | 814,662   | 815,261   | transposase                                                        |                                                                 | 600   |        | 2,395 |       |
| CDS   | BSEPE_0859 | +            | 815,407   | 815,739   | hypothetical protein                                               |                                                                 | 333   |        | 1,001 |       |
| LDS12 | CDS        | BSEPE_0860   | -         | 816,221   | 817,615                                                            | DNA (cytosine-5-)-methyltransferase                             | 1,395 | 2,401  | 712   | 667   |
|       | CDS        | BSEPE_0861   | -         | 817,599   | 818,621                                                            | type II site-specific deoxyribonuclease                         | 1,023 |        | 610   |       |
|       | CDS        | BSEPE_0862   | -         | 819,015   | 820,889                                                            | NAD+ synthase (glutamine-hydrolysing)                           |       | 1,875  |       | 1,353 |
|       | CDS        | BSEPE_0863   | +         | 821,188   | 822,195                                                            | general L-amino acid transport system substrate-binding protein |       | 1,008  |       | 1,616 |
| LDS14 | CDS        | BSEPE_1030   | +         | 994,662   | 995,672                                                            | IS4 family transposase                                          |       | 1,011  |       | N.C.  |
|       | CDS        | BSEPE_1031   | +         | 995,971   | 999,078                                                            | filamentous hemagglutinin                                       |       | 3,108  |       | 742   |
|       | CDS        | BSEPE_1032   | +         | 999,075   | 999,344                                                            | hypothetical protein                                            |       | 270    |       | 1,637 |
| LDS19 | CDS        | BSEPE_1404   | +         | 1,353,164 | 1,354,441                                                          | IS256 family transposase                                        |       | 1,278  |       | N.C.  |
|       | CDS        | BSEPE_1405   | +         | 1,354,854 | 1,357,313                                                          | DNA (cytosine-5-)-methyltransferase                             | 2,460 | 3,576  | 471   | 468   |
|       | CDS        | BSEPE_1406   | +         | 1,357,315 | 1,358,529                                                          | conserved hypothetical protein                                  | 1,215 |        | 493   |       |
|       | CDS        | BSEPE_1407   | -         | 1,358,858 | 1,359,145                                                          | XRE family transcriptional regulator                            |       | 288    |       | 3,286 |
| gene  | BSEPE_1408 | -            | 1,359,170 | 1,359,316 | Pseudogene. C-terminus of addiction module toxin, RelE/StbE family |                                                                 | 147   |        | 2,748 |       |
| LDS20 | CDS        | BSEPE_1419   | +         | 1,365,193 | 1,365,678                                                          | hypothetical protein                                            |       | 486    |       | 2,299 |
|       | CDS        | BSEPE_1420   | +         | 1,365,700 | 1,371,624                                                          | hypothetical protein                                            |       | 5,925  |       | 1,067 |
|       | CDS        | BSEPE_1421   | -         | 1,371,632 | 1,372,975                                                          | magnesium chelatase family protein                              |       | 1,344  |       | 1,327 |

\*Loci occupying longer than 2,000 bp with average mapping depth lower than 1,000 are listed (grey, except for *Locus\_N* in blue and *Locus\_H* in orange).

\*\*Genomic heterogeneities of these loci were confirmed by PacBio sequencing (see Figure S4)

\*\*\*N.C., nonspecific count in the mapped reads due to multi-copies of the gene in the BSEPE genome.
