# Supplementary figures and images for: Heterogeneous composition of key metabolic gene clusters in a vent mussel symbiont population
Source: PubMed Central journal article supplement — ISME J. 2015 Sep 29;10(4):990–1001. doi: 10.1038/ismej.2015.176 (PMC4796938; doi:10.1038/ismej.2015.176), 2015-09-29

**A**

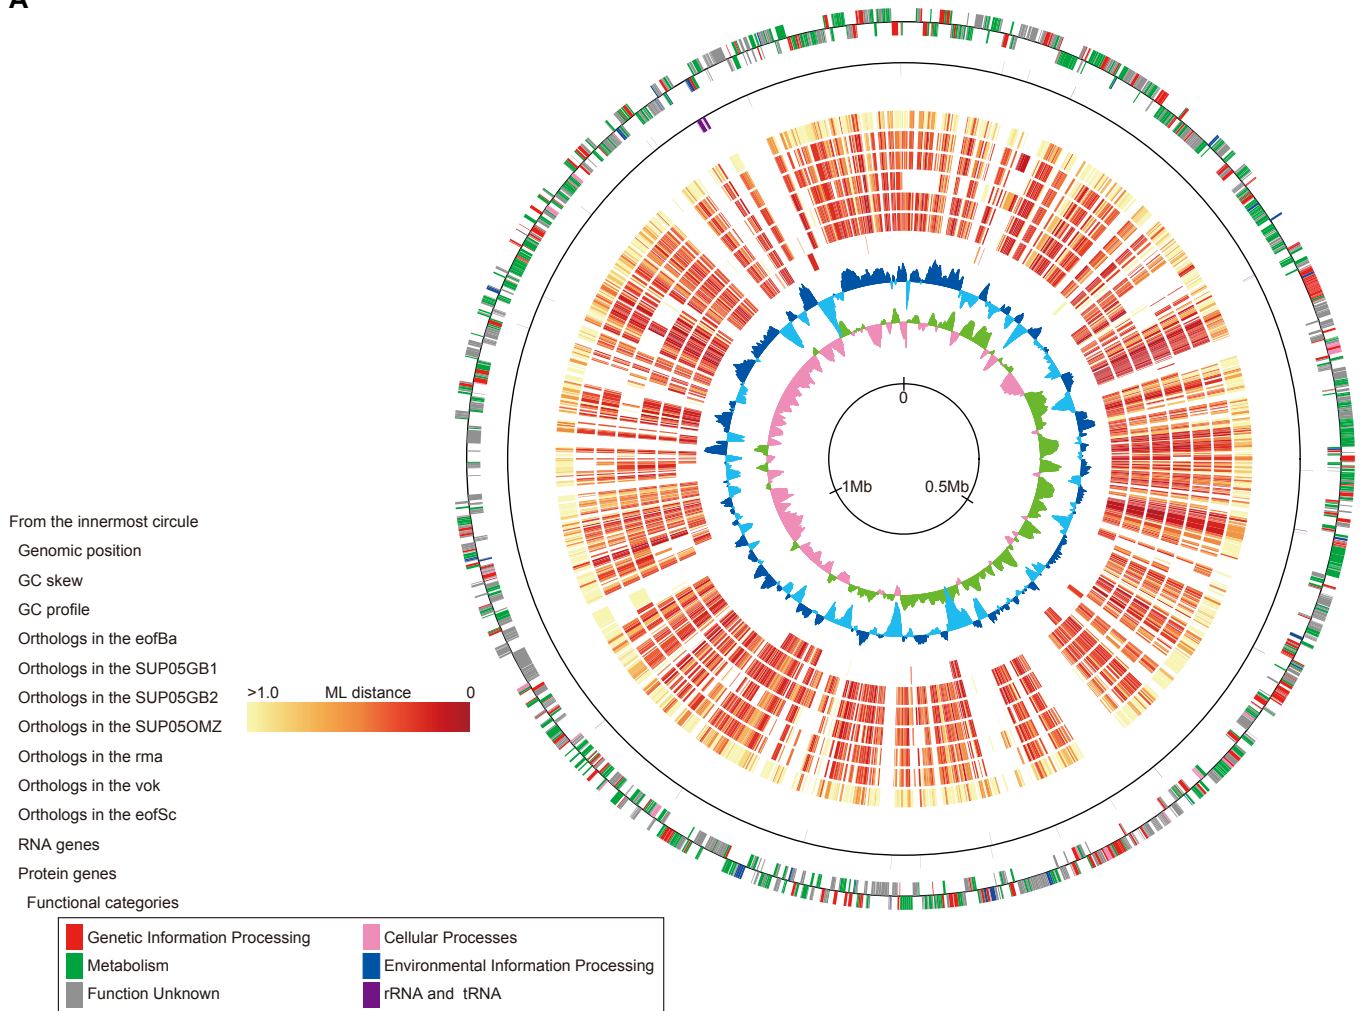

**B**

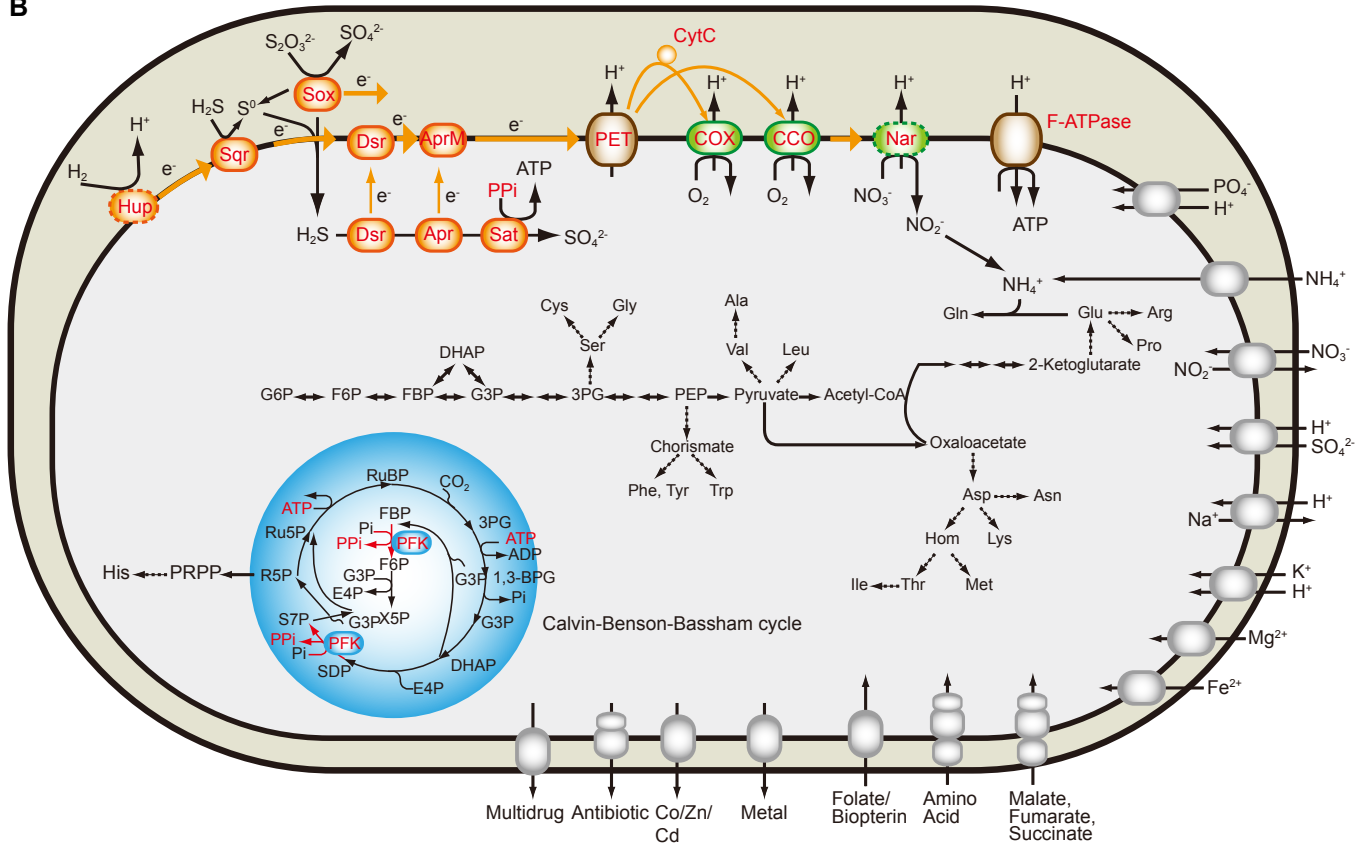

Supplement: ismej2015176x2.pdf [file ismej2015176x2.pdf]

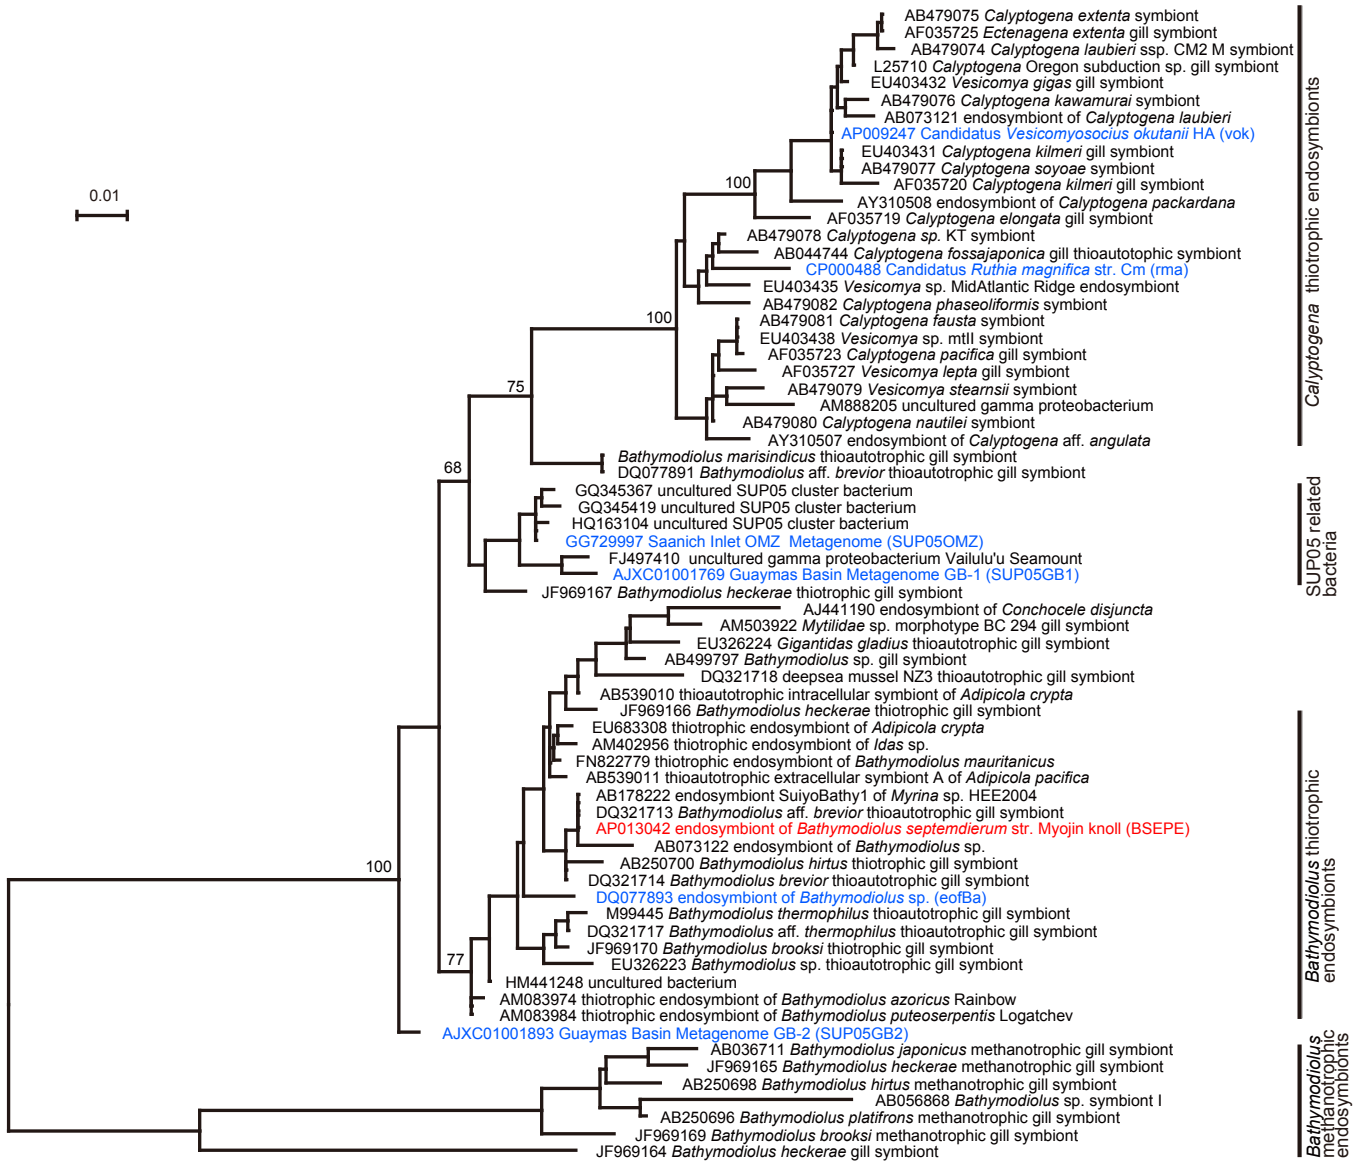

Supplement: ismej2015176x3.pdf [file ismej2015176x3.pdf]

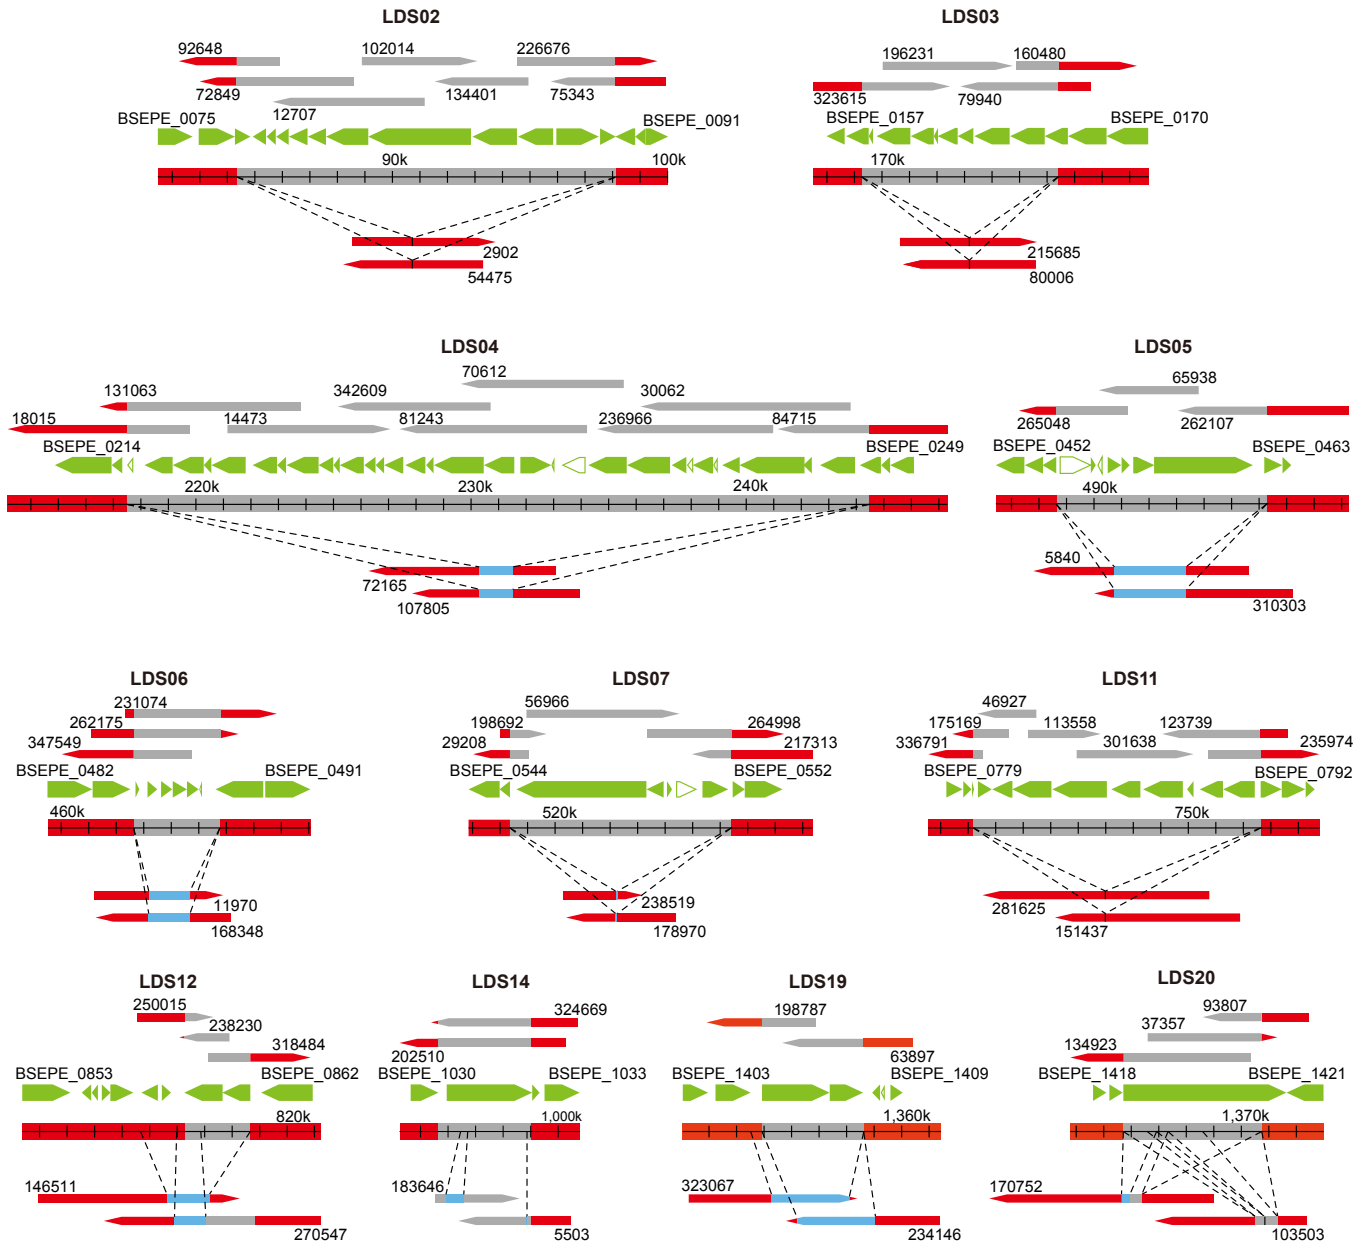

Supplement: ismej2015176x5.pdf [file ismej2015176x5.pdf]

**A**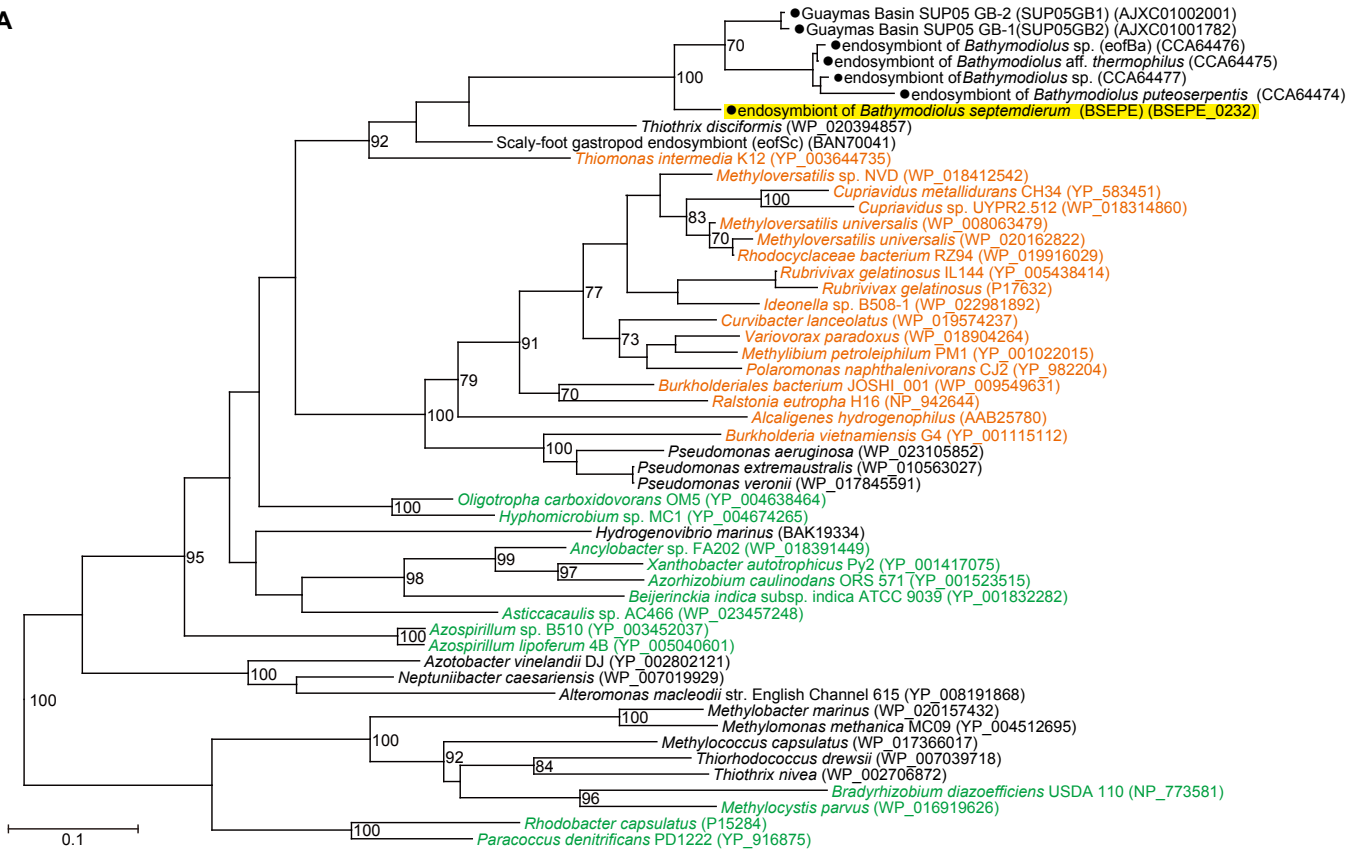**B**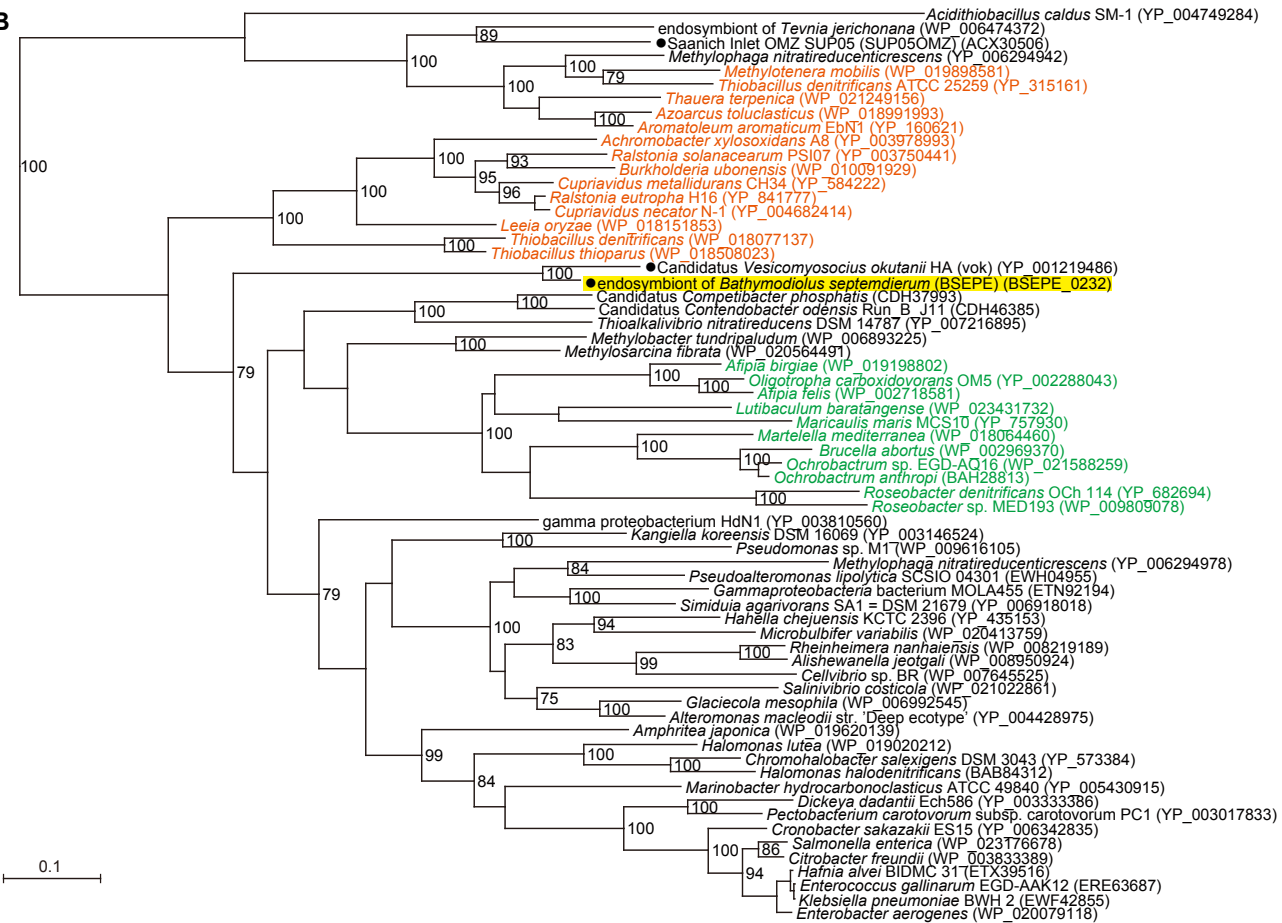

Supplement: ismej2015176x6.pdf [file ismej2015176x6.pdf]

**A** Endosymbiont of *Bathymodiolus septemdiarium*

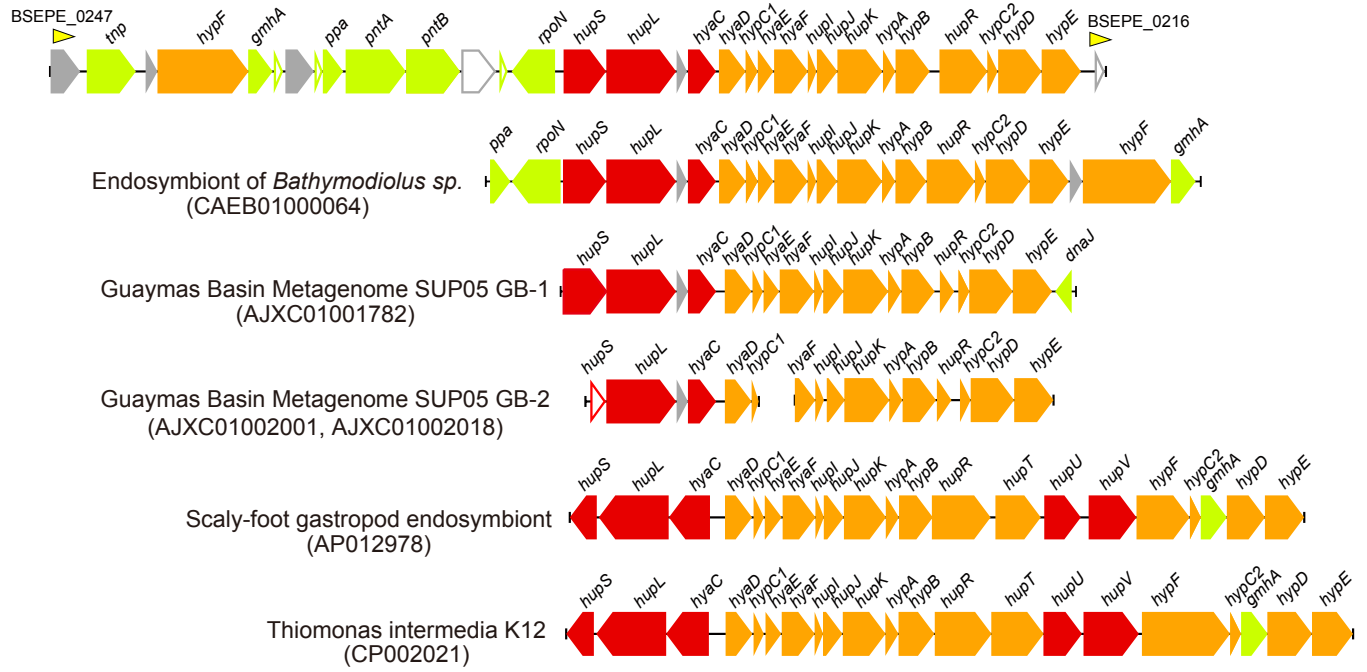

**B**

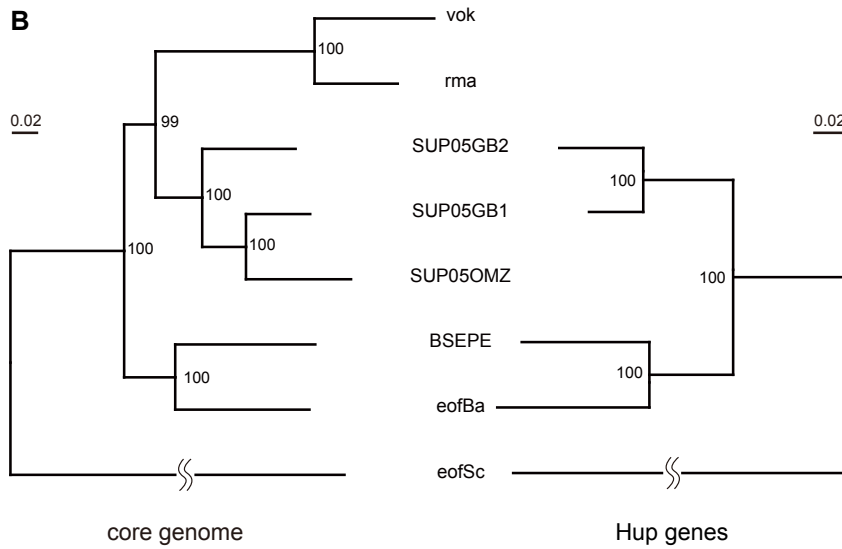

Supplement: ismej2015176x7.pdf [file ismej2015176x7.pdf]
